# Supplementary material for: Effect of valproate and pregabalin on human anxiety-like behaviour in a randomised controlled trial
Source: PubMed Central journal article supplement (PMC6095858; doi:10.1038/s41398-018-0206-7), 2018-08-16

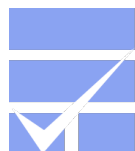

# CONSORT

TRANSPARENT REPORTING of TRIALS

## CONSORT 2010 Flow Diagram

### AAAX2 trial

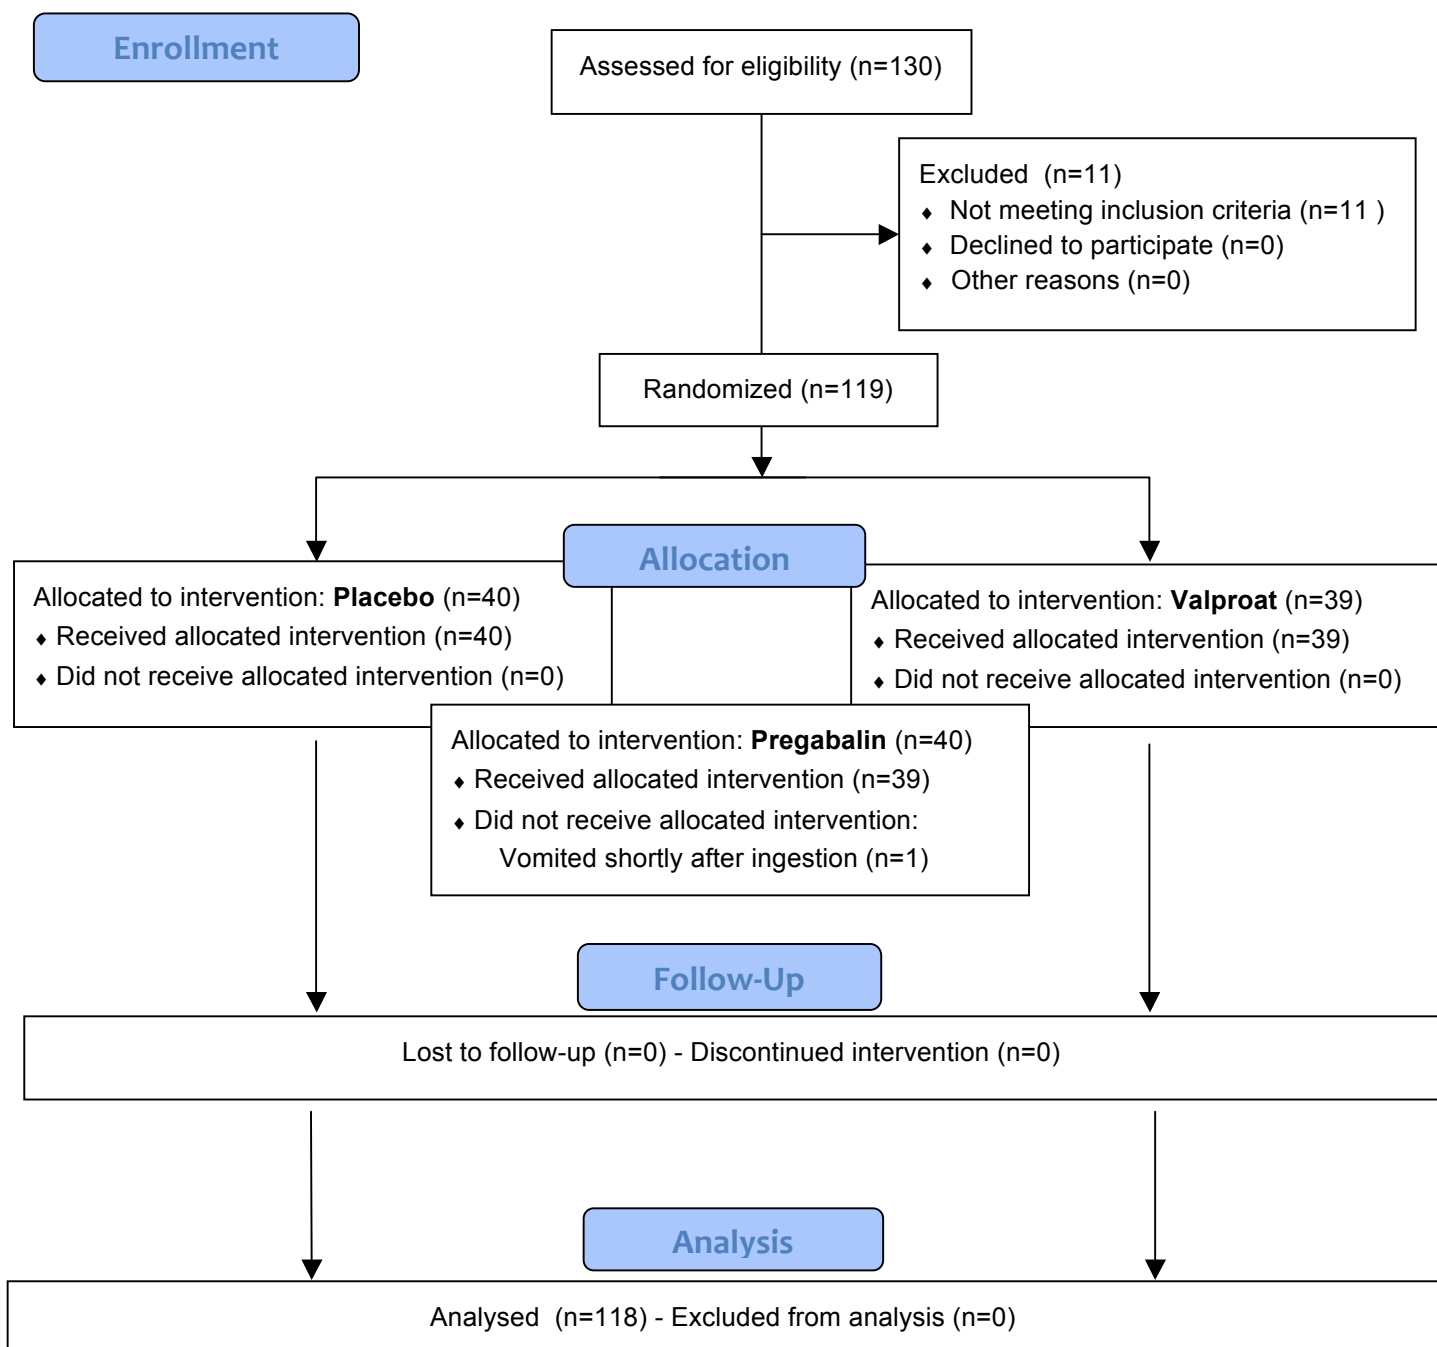

Supplement: 41398_2018_206_MOESM2_ESM.pdf [file 41398_2018_206_MOESM2_ESM.pdf]
